# Supplementary material for: Geocoding Error, Spatial Uncertainty, and Implications for Exposure Assessment and Environmental Epidemiology
Source: Int J Environ Res Public Health. 2020 Aug 12;17(16):5845. doi: 10.3390/ijerph17165845 (PMC7459468; doi:10.3390/ijerph17165845)

*Supplementary material for*

**Geocoding error, spatial uncertainty, and implications for exposure assessment  
and environmental epidemiology**

**Ellen J. Kinnee<sup>1\*</sup>, Sheila Tripathy<sup>2</sup>, Leah Schinasi<sup>3</sup>, Jessie L. C. Shmool<sup>4</sup>, Perry E. Sheffield<sup>5</sup>, Fernando Holguin<sup>6</sup>, and Jane E. Clougherty<sup>7</sup>**

<sup>1</sup> University Center for Social and Urban Research, University of Pittsburgh, Pittsburgh, Pennsylvania, United States ; ejk40@pitt.edu

<sup>2</sup> Drexel University Dornsife School of Public Health, Department of Environmental and Occupational Health, Philadelphia, Pennsylvania, United States; sheila.tripathy@gmail.com

<sup>3</sup> Drexel University Dornsife School of Public Health, Department of Environmental and Occupational Health, and Drexel University Urban Health Collaborative (UHC), Philadelphia, Pennsylvania, United States; lhs36@drexel.edu

<sup>4</sup> University of Pittsburgh Graduate School of Public Health, Department of Environmental and Occupational Health, Pittsburgh, Pennsylvania, United States; jlshmool@gmail.com

<sup>5</sup> Environmental Medicine and Public Health and Pediatrics, Icahn School of Medicine at Mount Sinai, New York, New York United States; perry.sheffield@mssm.edu

<sup>6</sup> Department of Medicine, University of Colorado School of Medicine, Aurora, Colorado, United States

<sup>7</sup> Drexel University Dornsife School of Public Health, Department of Environmental and Occupational Health, Philadelphia, Pennsylvania, United States; jec373@drexel.edu

\* Correspondence: ejk40@pitt.edu; Tel.: +1 412-385-5105

**Figure S1:** Street segment geocodes using various side offsets, and distance error. The default 20-foot offset (orange) is shown with calculated distance error from the reference (Address point). Alternative side offsets are shown [30 feet (blue), 40 feet (yellow), and 50 feet (purple)].

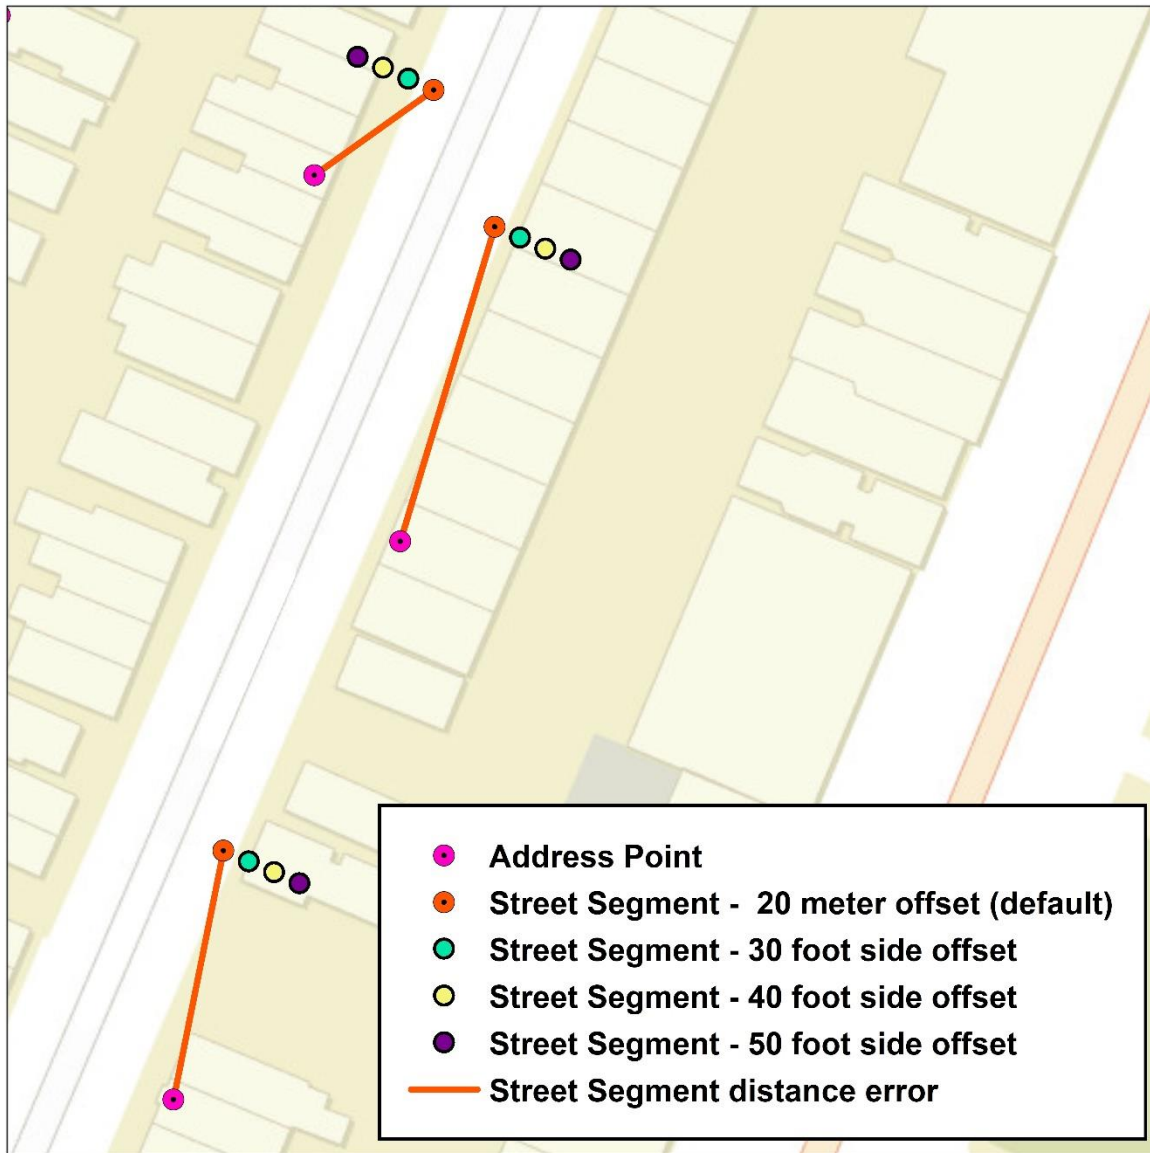

**Figure S2:** Buffer-based exposure assignment for NO<sub>2</sub>, using each of the three geocoding methods and the NYCCAS NO<sub>2</sub> surface.

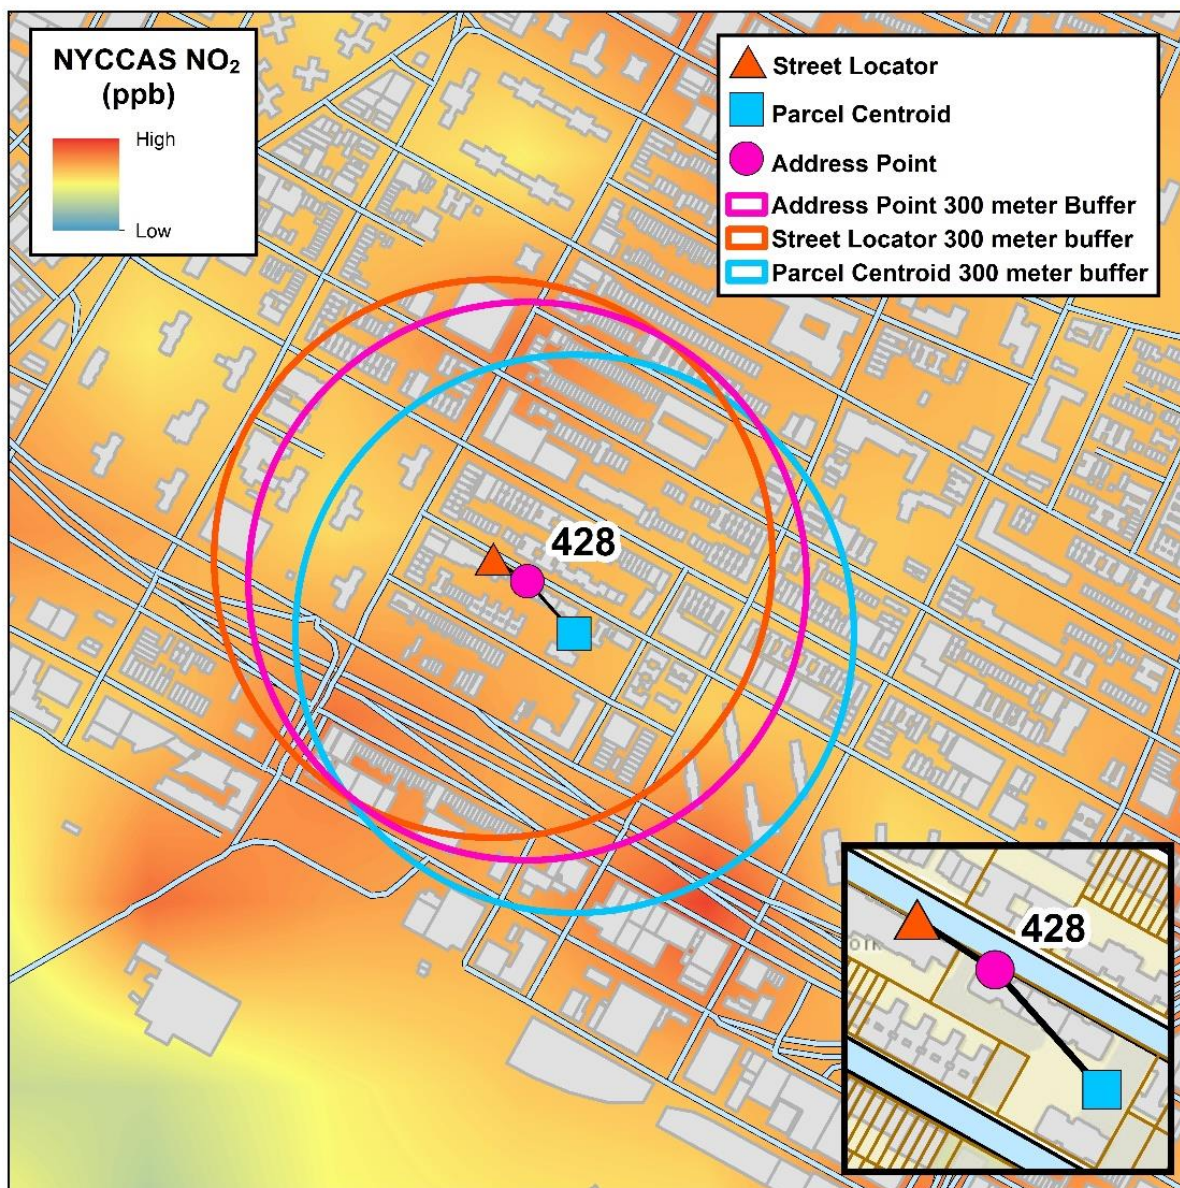



**Table S1: Missingness rates: Overall missingness rate for all addresses (n=21,183), and by ZIP Code (n= 157 ZIP Code areas)**

| Method (locator) | Overall missingness rate | Average missingness by ZIP | SD (by ZIP) | Median (by ZIP) | Min (by ZIP) | Max (by ZIP) |
|------------------|--------------------------|----------------------------|-------------|-----------------|--------------|--------------|
| Address Point    | 9.6                      | 9.9                        | 8.4         | 8.0             | 0            | 70.0         |
| Street Segment   | 6.1                      | 9.9                        | 6.0         | 6.0             | 0            | 42.0         |
| Parcel Centroid  | 38.1                     | 35.0                       | 23.5        | 28.0            | 0            | 93.0         |

**Table S2: Frequency (percentage) with directional error in each of four directional quadrants, by method**

| Method          | North         | East          | South         | West          |
|-----------------|---------------|---------------|---------------|---------------|
| Street Segment  | 5,040 (23.8%) | 3,853 (18.2%) | 5,944 (28.1%) | 6,346 (29.9%) |
| Parcel Centroid | 4,968 (23.5%) | 5,987 (28.3%) | 4,836 (22.8%) | 5,392 (25.5%) |

**Table S3: Change in Census Tract, Block Group, and Block assignment using Street Segment or Parcel Centroid geocodes, compared to Address points (n = 21,183)**

| Geocoding method                       | # Tracts changed (%) | # Block Groups changed (%) | # Blocks changed (%) |
|----------------------------------------|----------------------|----------------------------|----------------------|
| Street Segment                         | 63 (2.9%)            | 188 (1.2%)                 | 301 (0.78%)          |
| Parcel Centroid                        | 13 (0.6%)            | 119 (0.77%)                | 111 (0.29%)          |
| Total in domain                        | 2,167                | 15,464                     | 38,794               |
| Mean area of polygon (m <sup>2</sup> ) | 362,888              | 129,780                    | 20,186               |

**Figure S4: Color-coded spatial uncertainty (distance error), overlaid with above/ below-median number of addresses per ZIP code. There is no consistent pattern in distance error by address density.**

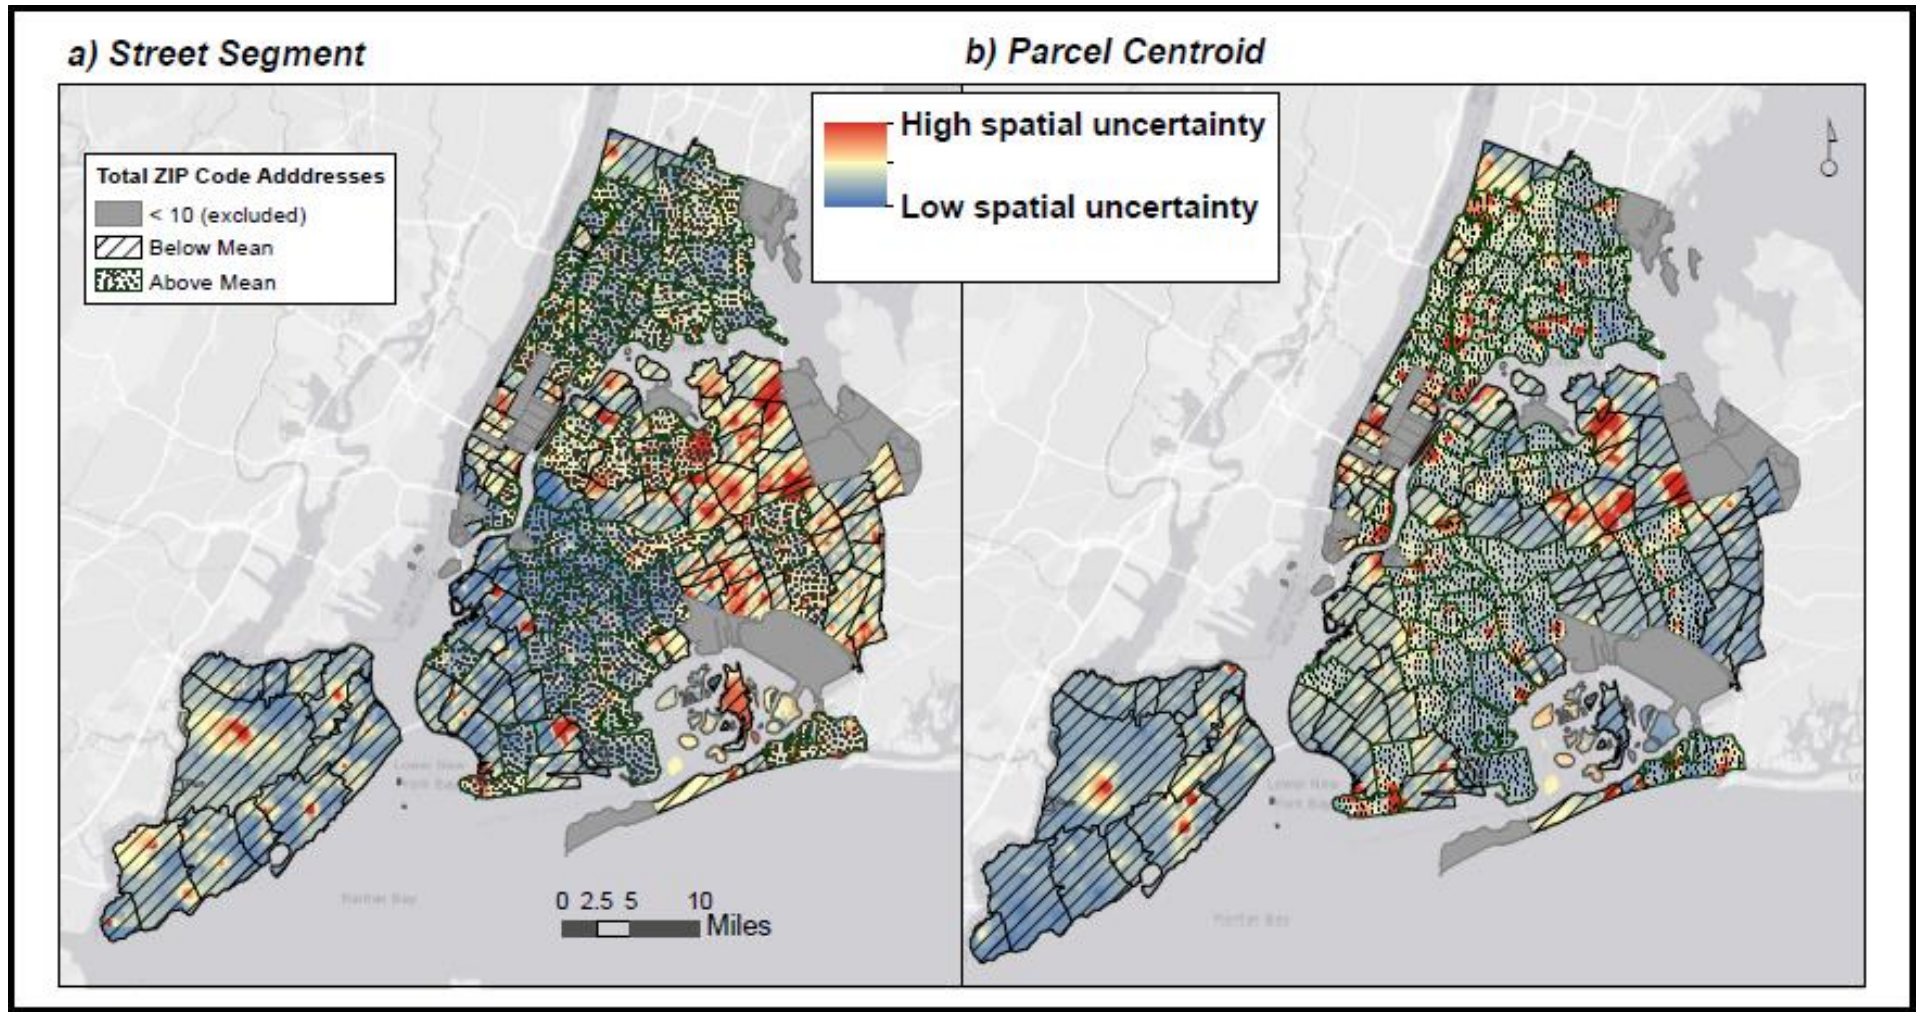

Supplement: Supplementary file 1 [file ijerph-17-05845-s001.pdf]
